# Supplementary material for: LAMP2 Cardiomyopathy: Consequences of Impaired Autophagy in the Heart
Source: PubMed Central journal article supplement — J Am Heart Assoc. 2021 Aug 28;10(17):e018829. doi: 10.1161/JAHA.120.018829 (PMC8649277; doi:10.1161/jaha.120.018829), 2021-08-28
Supplement: JAH3-10-e018829-s001.pdf [file JAH3-10-e018829-s001.pdf]

# **Supplemental Material**

**Table S1. RNA expression in wild-type and L2<sup>Δ6</sup> hearts.**

| Gene category            | All genes | L2 <sup>Δ6</sup> > WT | P      | L2 <sup>Δ6</sup> < WT | P    |
|--------------------------|-----------|-----------------------|--------|-----------------------|------|
| <b>All RNAs</b>          | 31920     | 1278 (4%)             |        | 707 (2.2%)            |      |
| <b>Autophagy markers</b> | 793       | 62 (7.8%)             | <0.001 | 15 (1.9%)             | 0.54 |
| <b>Apoptotic markers</b> | 1252      | 85(6.8%)              | <0.001 | 21(1.7%)              | 0.2  |

Percentages represent gene counts in each category out of the total gene counts. A change in gene expression was defined by at least  $\geq 1.5$  or  $< 0.67$  ratio in the read count (for increase or decrease respectively).

L2<sup>Δ6</sup> > WT, number of genes expressed in L2<sup>Δ6</sup> tissue at a higher level than in wildtype (WT) tissue. L2<sup>Δ6</sup> < WT, number of genes expressed in L2<sup>Δ6</sup> tissue at a lower level than in wild type (WT) tissue. P values - comparison of the percent change between all RNAs and markers of either Autophagy or Apoptosis.

All RNAs, reflects RNAs identified as expressed by RNAseq as described by Christodoulou et al<sup>27</sup>.

Autophagy markers is a set of autophagy-associated proteins collected from <http://www.tanpaku.org/autophagy/list/GeneList.html>. Apoptotic signaling pathway genes collected from <http://www.informatics.jax.org/go/term/GO:0097190>.

Specific details of the genes and the fold changes in expression are available upon request.

The full results of the transcriptome analysis are provided at <https://www.ncbi.nlm.nih.gov/geo/query/acc.cgi?acc=GSE166731> (GEO accession number GSE166731).

**Table S2. Autophagy and apoptosis related genes showing the greatest change in expression in hearts of L2<sup>Δ6</sup> mice.**

|                  | <b>Gene ID</b> | <b>Gene description</b>                     | <b>Fold change (L2<sup>Δ6</sup>/WT)</b> | <b>WT normalized reads</b> | <b>Regulation</b> | <b>P-value</b> |
|------------------|----------------|---------------------------------------------|-----------------------------------------|----------------------------|-------------------|----------------|
| <b>Autophagy</b> | <i>Tlr13</i>   | toll-like receptor 13                       | 16.30                                   | 0.12                       | up                | <0.0001        |
|                  | <i>Crocc</i>   | ciliary rootlet coiled-coil                 | 3.97                                    | 0.83                       | up                | 0.0003         |
|                  | <i>Bcl2l1</i>  | BCL2-like 1                                 | 3.75                                    | 157.54                     | up                | <0.0001        |
|                  | <i>Sgk1</i>    | serum/glucocorticoid regulated kinase 1     | 3.41                                    | 31.15                      | up                | <0.0001        |
|                  | <i>Ddit4</i>   | DNA-damage-inducible transcript 4           | 3.40                                    | 81.68                      | up                | <0.0001        |
|                  | <i>Rcan1</i>   | regulator of calcineurin 1                  | 3.26                                    | 103.20                     | up                | <0.0001        |
|                  | <i>Tecpr1</i>  | tectonin beta-propeller repeat containing 1 | 3.12                                    | 25.56                      | up                | <0.0001        |
|                  | <i>Il18r1</i>  | interleukin 18 receptor 1                   | 0.12                                    | 16.00                      | down              | 0.0005         |
|                  | <i>Phkg1</i>   | phosphorylase kinase gamma 1                | 0.29                                    | 267.00                     | down              | <0.0001        |
|                  | <i>Alpl</i>    | alkaline phosphatase                        | 0.31                                    | 146.00                     | down              | <0.0001        |
| <b>Apoptosis</b> | <i>Bid</i>     | BH3 interacting domain death agonist        | 49.00                                   | 0.00                       | up                | <0.0001        |
|                  | <i>Lcn2</i>    | lipocalin 2                                 | 26.66                                   | 6.90                       | up                | 0.0005         |
|                  | <i>S100a9</i>  | S100 calcium binding protein A9             | 16.87                                   | 0.59                       | up                | 0.0003         |
|                  | <i>Bdkrb2</i>  | bradykinin receptor, beta 2                 | 10.22                                   | 0.36                       | up                | <0.0001        |
|                  | <i>Ankrd2</i>  | ankyrin repeat domain 2                     | 9.27                                    | 0.36                       | up                | <0.0001        |
|                  | <i>Plaur</i>   | plasminogen activator                       | 5.43                                    | 0.71                       | up                | <0.0001        |
|                  | <i>Cdkn1a</i>  | cyclin-dependent kinase inhibitor 1A        | 4.92                                    | 85.01                      | up                | <0.0001        |
|                  | <i>Pawr</i>    | PRKC, apoptosis                             | 4.03                                    | 1.19                       | up                | <0.0001        |
|                  | <i>Trp63</i>   | transformation related protein 63           | 0.08                                    | 4.52                       | down              | <0.0001        |
|                  | <i>Cx3cr1</i>  | chemokine (C-X3-C motif) receptor 1         | 0.20                                    | 3.45                       | down              | <0.0001        |

Ten genes which changed most (in either direction) are shown in each category. RNAseq libraries were constructed from hearts of adult L2<sup>Δ6</sup> and WT mice and data were analyzed as described<sup>27</sup>.

**Figure S1. Average weight of 10 WT and 10 L2<sup>Δ6</sup> mice at 4, 8, and 12 weeks.**

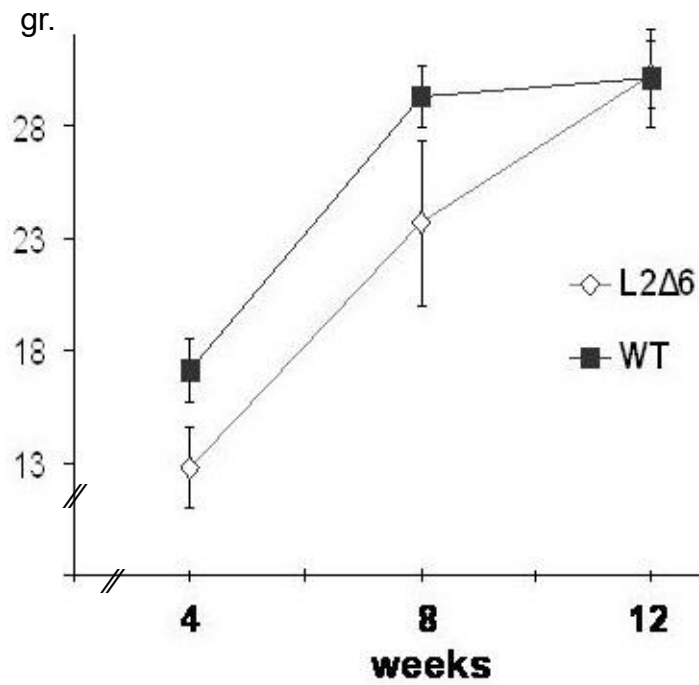

The L2<sup>Δ6</sup> had a lower body weight at 4 weeks but the differences were not anymore apparent at 12 weeks age.

**Figure S2. Cell death in L2<sup>Δ6</sup> hearts.**

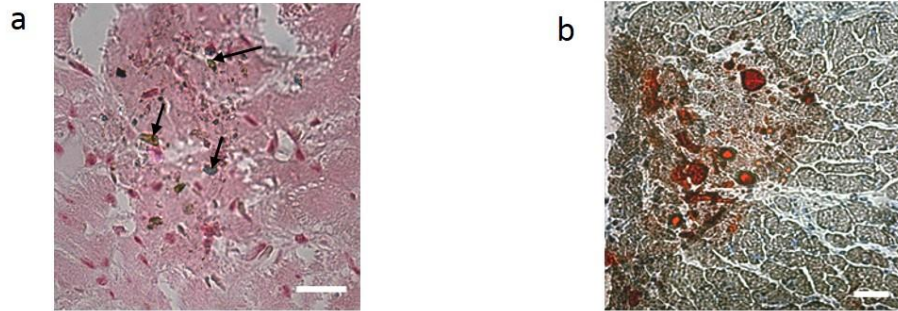

(a) Von Kossa stains of 40-week old L2<sup>Δ6</sup> hearts show dystrophic calcification (arrows) consistent with necrosis (scale bar = 50 μm). (b) Oil-red-O staining of frozen section of 40 week old L2<sup>Δ6</sup> heart showing fat depositions (in red) within the myocardium. Scale bar = 50μm.

Figure S3. RNAseq analysis.

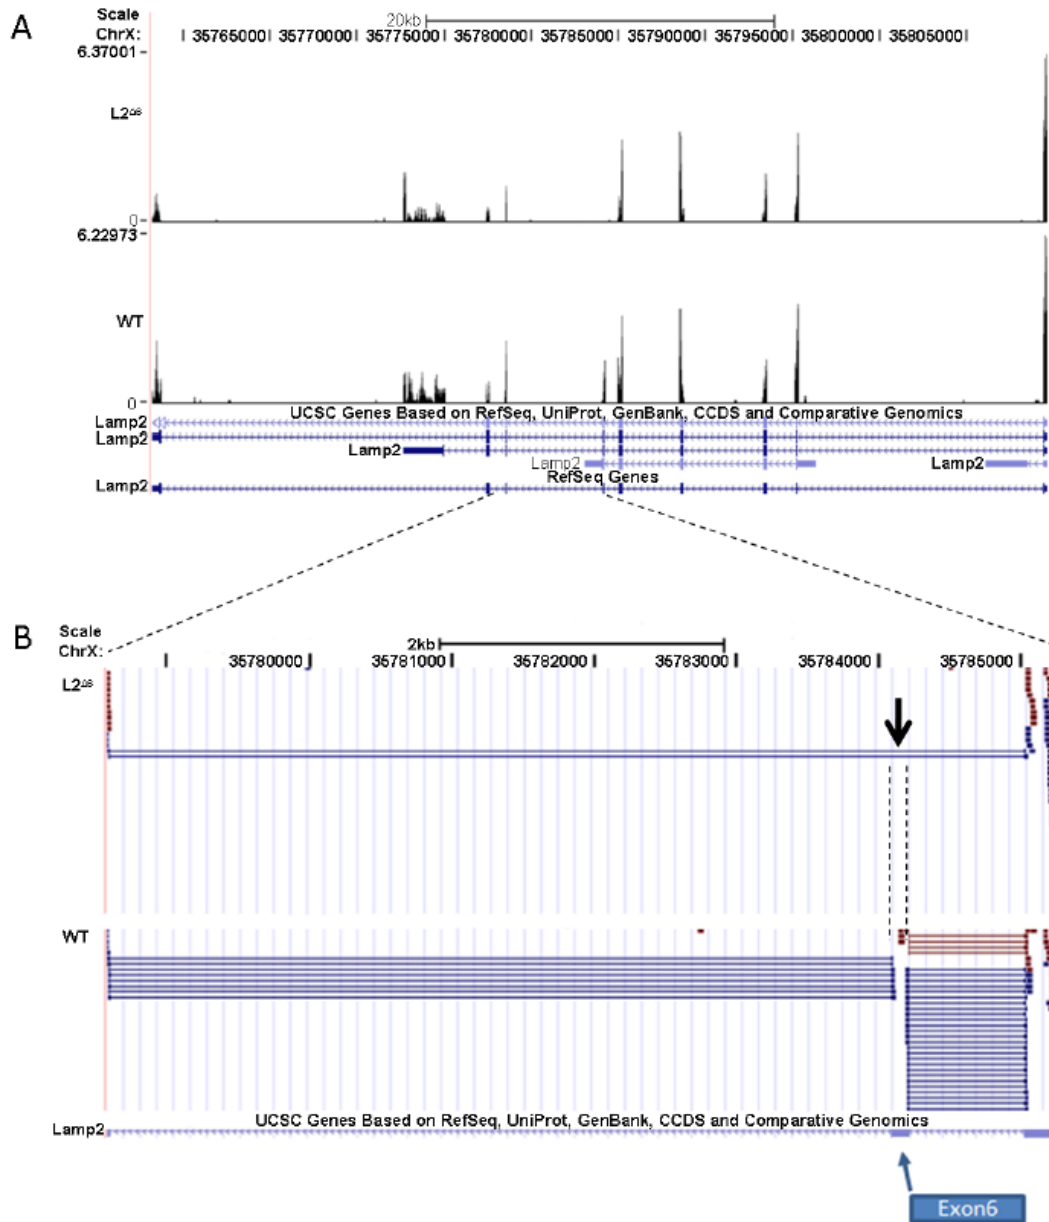

RNAseq analysis is demonstrated by the assessment of Lamp2 RNA expression in WT and L2<sup>A6</sup> hearts.

A) Screen shot of UCSC Genome Browser custom tracks

(WIG files; [http://genome.ucsc.edu/cgi-](http://genome.ucsc.edu/cgi-bin/hgTracks?hgS_doOtherUser=submit&hgS_otherUserName=JonSeidman&hgS_other)

[bin/hgTracks?hgS\\_doOtherUser=submit&hgS\\_otherUserName=JonSeidman&hgS\\_other](http://genome.ucsc.edu/cgi-bin/hgTracks?hgS_doOtherUser=submit&hgS_otherUserName=JonSeidman&hgS_other)

UserSessionName=Lamp2\_mm9), displaying the LAMP2 gene and normalized number of DNA sequence reads per million in L2<sup>Δ6</sup> and wildtype LV RNAseq libraries (see Methods). RNAseq libraries were constructed from 2 micrograms of total left ventricular RNA pooled from two mice of each genotype (see Methods). Four different LAMP2 isoforms are presented in the UCSC gene list. LAMP2 extends from exon 1 (right) to exon 10 (left). Note that 5' exons are more highly represented in this RNAseq data than 3' exons because of the method used for RNAseq library construction (our unpublished results).

**B)** Screen shot from custom tracks (BAM files) of UCSC Genome Browser displaying DNA sequence reads obtained from L2<sup>Δ6</sup> and WT LV RNAseq libraries between exon 5 and 7. Exon 6 is skipped in L2<sup>Δ6</sup> RNA as predicted by PCR analysis (black arrow).

**Figure S4. Expression of key calcium handling proteins in L2<sup>Δ6</sup> hearts.**

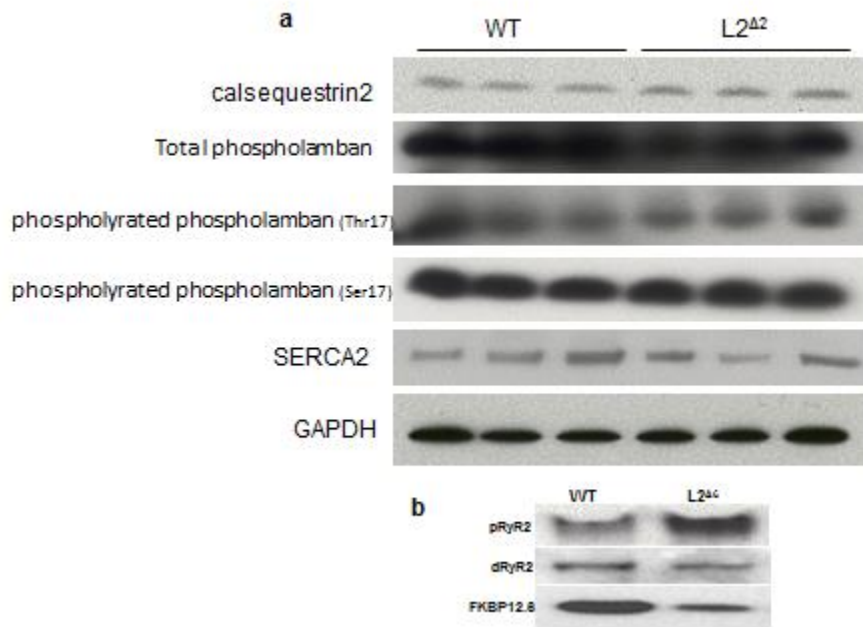

**a)** Western blot analysis of Calsequestrin2, Phospholamban (both total and the phosphorylated forms) and the cardiac sarcoplasmic reticulum Ca<sup>2+</sup>-ATPase (SERCA2) revealed no differences in the expression between wild type and L2<sup>Δ6</sup>.

**b)** Increased expression of phosphorylated RyR2 and decreased expression of FKBP12.6 (calstabin) in L2<sup>Δ6</sup> hearts. See also figure 5.

All analyses were done on sarcoplasmic reticulum fraction of ventricular muscle extracts.



**Figure S5. Cyclosporin A inhibits hypertrophy in L2<sup>Δ6</sup> hearts.**

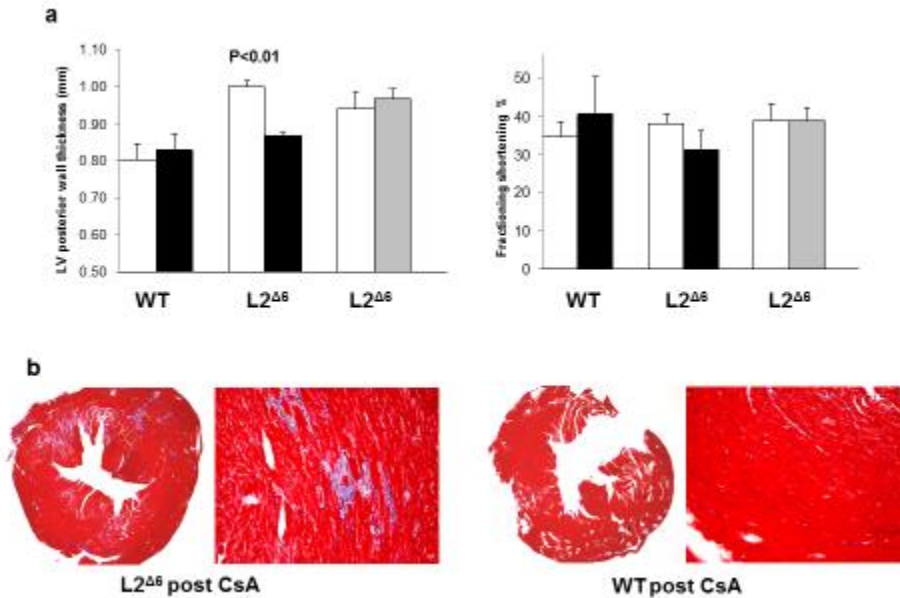

a) Left ventricular posterior wall thickness (left panel) and left ventricular fractional shortening (right panel) before (white bars) and after (black bars) 2 weeks of treatment with Cyclosporin A (CsA) in L2<sup>Δ6</sup> and wild type (WT) mice (two subcutaneous injections of

15 mg/kg in PBS daily). The gray bars represent control age-matched L2<sup>Δ6</sup> mice that were followed for 2 weeks without treatment (mean  $\pm$  SEM,  $n=3$ /group, age at examination 32 weeks). Left ventricular posterior wall thickness was significantly reduced in treated L2<sup>Δ6</sup> hearts compared to untreated ( $p < 0.01$ ). No significant differences were found in the interventricular septum thickness, left ventricular dimension or fractional shortening b) Histology section stained with Masson's trichrome for fibrosis (in blue) of L2<sup>Δ6</sup> and wild type hearts assessed two weeks after treatment with CsA. The amount of fibrosis in L2<sup>Δ6</sup> hearts was comparable to untreated hearts (see Figure 1 for reference). There was no significant fibrosis in age-matched wild type hearts before or after treatment (data not shown).
